# Supplementary material for: Aquapentachlororhenate(iv): a singular and promising building block for metal assembly
Source: Royal Society of Chemistry journal article supplement (doi:10.1039/c5ra10225a), 2015-01-01
Supplement: c5ra10225a1.pdf [file c5ra10225a1.pdf]

## Electronic Supplementary Information (ESI)

### **Aquapentachlororhenate(IV): a singular and promising building block for metal assembling**

**Donatella Armentano<sup>\*a</sup> and José Martínez-Lillo<sup>\*b</sup>**

*<sup>a</sup> Centro di Eccellenza CEMIF.CAL, Dipartimento di Chimica e Tecnologie Chimiche, Università della Calabria, via P. Bucci 14/c, 87030, Arcavacata di Rende (CS), Italy. E-mail: [donatella.armentano@unical.it](mailto:donatella.armentano@unical.it)*

*<sup>b</sup> Instituto de Ciencia Molecular (ICMol), Universitat de València, C/ Catedrático José Beltrán 2, 46980, Paterna, Valencia, Spain. E-mail: [lillo@uv.es](mailto:lillo@uv.es).*

| <b>Table of contents.</b>    | <b>page</b> |
|------------------------------|-------------|
| <b>Preparation of 1.....</b> | <b>2</b>    |
| <b>Figure S1.....</b>        | <b>3</b>    |
| <b>Table S1.....</b>         | <b>4</b>    |
| <b>Figure S2.....</b>        | <b>5</b>    |
| <b>Figure S3.....</b>        | <b>5</b>    |
| <b>Figure S4.....</b>        | <b>6</b>    |
| <b>Figure S5.....</b>        | <b>7</b>    |
| <b>Figure S6.....</b>        | <b>8</b>    |

### Preparation of **1**.

All manipulations were performed under aerobic conditions, using chemicals as received. Type 3Å molecular sieves were used to dry the MeCN before use, it was not distilled. The PPh<sub>4</sub>[ReCl<sub>5</sub>(pyz)] precursor was prepared following the literature procedure but by using PPh<sub>4</sub>Cl instead of NBu<sub>4</sub>Cl (see Ref. 11(a) in the main text).

**1**. PPh<sub>4</sub>[ReCl<sub>5</sub>(pyz)] (0.02 mmol, 15.7 mg) was dissolved in acetonitrile (0.1% in H<sub>2</sub>O, 3 mL) and added to MoCl<sub>5</sub> (0.02 mmol, 5.5 mg) dissolved in ethyl acetate (6 mL). The resulting yellow solution was filtered and left to evaporate at room temperature. Green-yellow crystals of **1** were grown in 2 weeks, which were suitable for X-ray diffraction studies. Yield: 12%. To obtain better yield **1** can be prepared by dissolving PPh<sub>4</sub>[ReCl<sub>5</sub>(pyz)] in an acetonitrile:water (1:1, v/v, 10 mL) solution and evaporating at room temperature. Yield: 40%. Compound **1** is air-stable over a period of several months without being oxidized under ambient conditions. Anal. Cald. (found) for C<sub>24</sub>H<sub>22</sub>OPCl<sub>5</sub>Re (**1**): C, 40.0 (39.8); H, 3.1 (2.9) %. IR peaks (cm<sup>-1</sup>): the absorption associated to water molecule appears at 3450br. **1** is soluble in the majority of the organic solvents, for example, it is soluble in DMF, MeCN and MeNO<sub>2</sub>.

A)

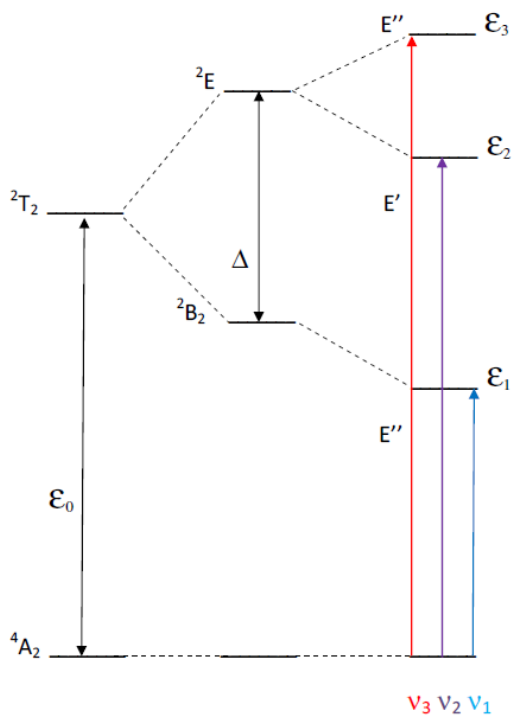

B) Equation (1):

$$\left. \begin{aligned} \epsilon_1 &= \lambda/2 [v + 1/2 - q] \\ \epsilon_2 &= \lambda [v - 1/2] \\ \epsilon_3 &= \lambda/2 [(v + 1/2) + q] \end{aligned} \right\} (1)$$

where  $q = [v^2 + v + 9/4]^{1/2}$ ;  $\epsilon_0 = 5P - 17.6 * (B^2/Dq)$ ;  $P = 3B + C \approx 7B$ ;  $C \approx 4B$ .

**Figure S1.** A) Energy levels diagram showing the splitting of the  $2T_2$  term, due to the spin-orbit coupling, and indicating the assignment of the spin-forbidden d-d transitions ( $v_1$ ,  $v_2$  and  $v_3$ ) in **1**. B) Expressions employed to calculate the parameters  $10Dq$ ,  $B_{\text{complex}}$ ,  $\Delta$ , and  $\lambda$  from the energy values ( $\epsilon_1 = 13405 \text{ cm}^{-1}$ ,  $\epsilon_2 = 14599 \text{ cm}^{-1}$ , and  $\epsilon_3 = 15528 \text{ cm}^{-1}$ ) of the electronic spectrum of **1** [ $10Dq = 30000 \text{ cm}^{-1}$ ,  $B_{\text{complex}} = 435 \text{ cm}^{-1}$ ,  $\Delta = 970 \text{ cm}^{-1}$ , and  $\lambda = 1060 \text{ cm}^{-1}$ ].

**Table S1.** Selected bond lengths [ $\text{\AA}$ ] and angles [ $^\circ$ ] for **1**.

---

|                       |                       |
|-----------------------|-----------------------|
| Re(1)-O(1W)           | Re(1)-Cl(1)#2         |
| Re(1)-Cl(1)           | Re(1)-Cl(1)#3         |
| Re(1)-Cl(1)#1         | Re(1)-Cl(2)           |
| O(1W)-Re(1)-Cl(1)     | Cl(1)-Re(1)-Cl(1)#3   |
| O(1W)-Re(1)-Cl(1)#1   | Cl(1)#1-Re(1)-Cl(1)#3 |
| Cl(1)-Re(1)-Cl(1)#1   | Cl(1)#2-Re(1)-Cl(1)#3 |
| O(1W)-Re(1)-Cl(1)#2   | O(1W)-Re(1)-Cl(2)     |
| Cl(1)-Re(1)-Cl(1)#2   | Cl(1)-Re(1)-Cl(2)     |
| Cl(1)#1-Re(1)-Cl(1)#2 | Cl(1)#1-Re(1)-Cl(2)   |
| O(1W)-Re(1)-Cl(1)#3   | Cl(1)#2-Re(1)-Cl(2)   |
|                       | Cl(1)#3-Re(1)-Cl(2)   |

---

Symmetry transformations used to generate equivalent atoms:

#1  $y, -x+1/2, z$

#2  $-y+1/2, x, z$

#3  $-x+1/2, -y+1/2, z$

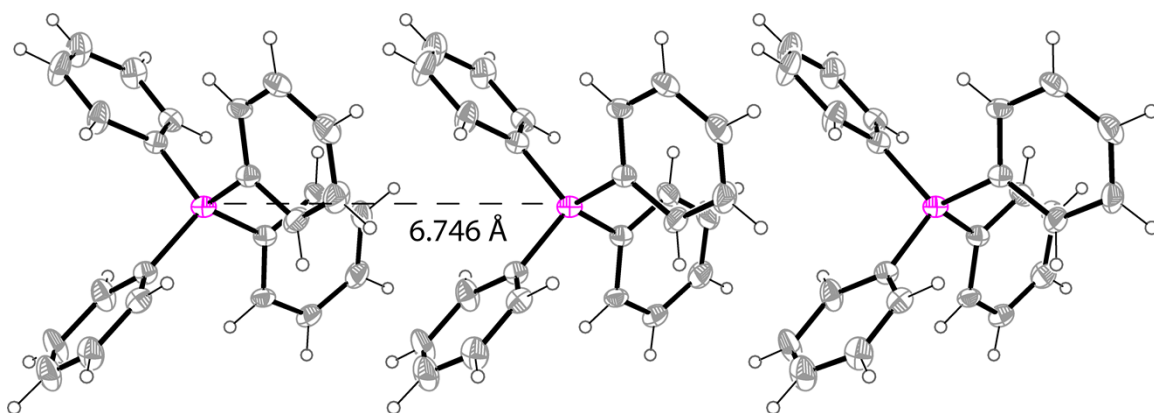

**Figure S2.** Detail of the *four-fold* phenyl embrace supramolecular motif of the  $\text{PPh}_4^+$  cations in **1**, in which four phenyl rings are involved in edge to face intermolecular interactions.

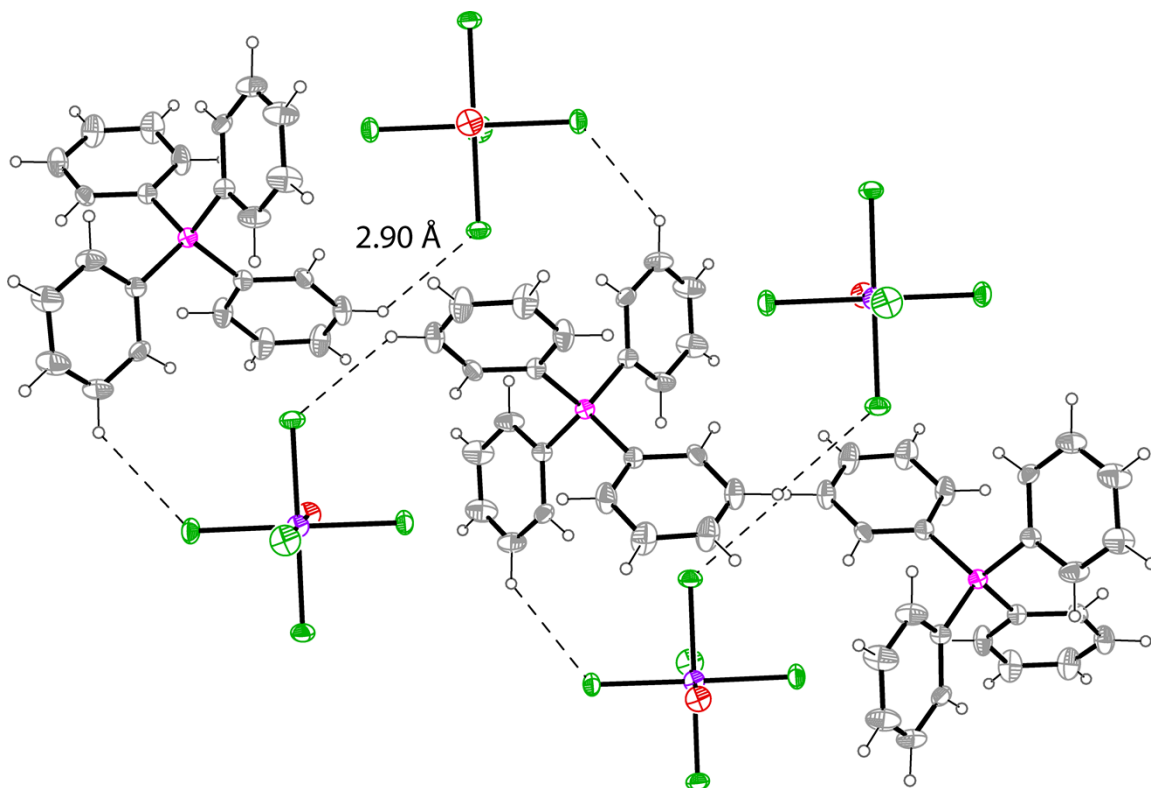

**Figure S3.** View along the *c* axis of the weak  $\text{Cl}\cdots\text{H-C}$  interactions (dashed lines) between  $[\text{ReCl}_5(\text{H}_2\text{O})]^-$  anions and  $(\text{PPh}_4)^+$  cations in **1**. Colour code: violet, Re; green, Cl; O, red; pink, P; grey, C; white, H.

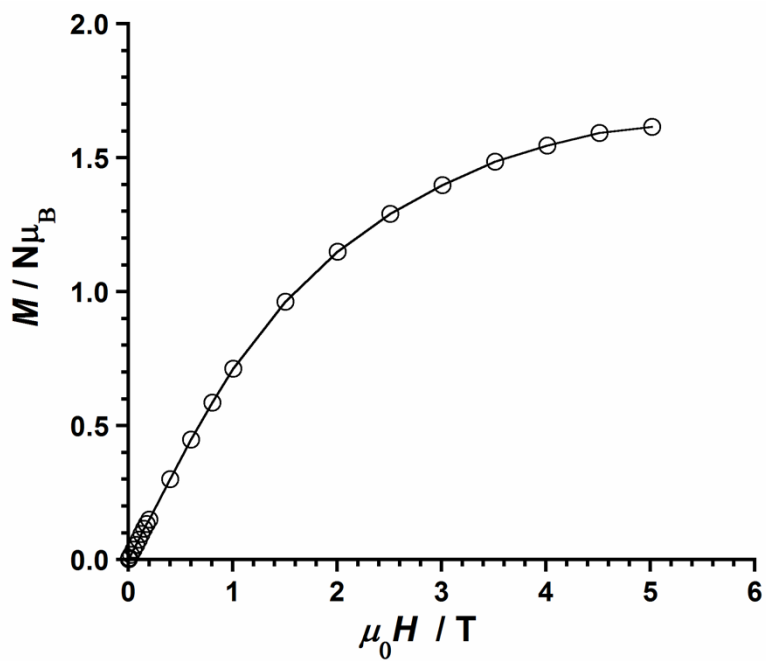

**Figure S4.** Magnetisation curve for **1** at 2 K. The open circles are the experimental data and the solid line is a visual guide.

$$\hat{H} = D \left[ (\hat{S}_z)^2 - S(S+1)/3 \right] + g_{\parallel} \beta H_z \hat{S}_z + g_{\perp} \beta (H_x \hat{S}_x + H_y \hat{S}_y) \quad (2)$$

$$\chi_M = \frac{\chi_{\parallel} + 2\chi_{\perp}}{3} \quad (3)$$

where

$$\chi_{\parallel} = \frac{N\beta^2 g_{\parallel}^2}{4k(T-\theta)} \frac{1 + 9 \exp(-2D/kT)}{1 + \exp(-2D/kT)}$$

$$\chi_{\perp} = \frac{N\beta^2 g_{\perp}^2}{k(T-\theta)} \frac{1 + (3kT/4D) [1 - \exp(-2D/kT)]}{1 + \exp(-2D/kT)}$$

**Figure S5.** Hamiltonian [eqn (2)] and its derived analytical expression [eqn (3)] employed to fit the magnetic susceptibility data of compound **1**.

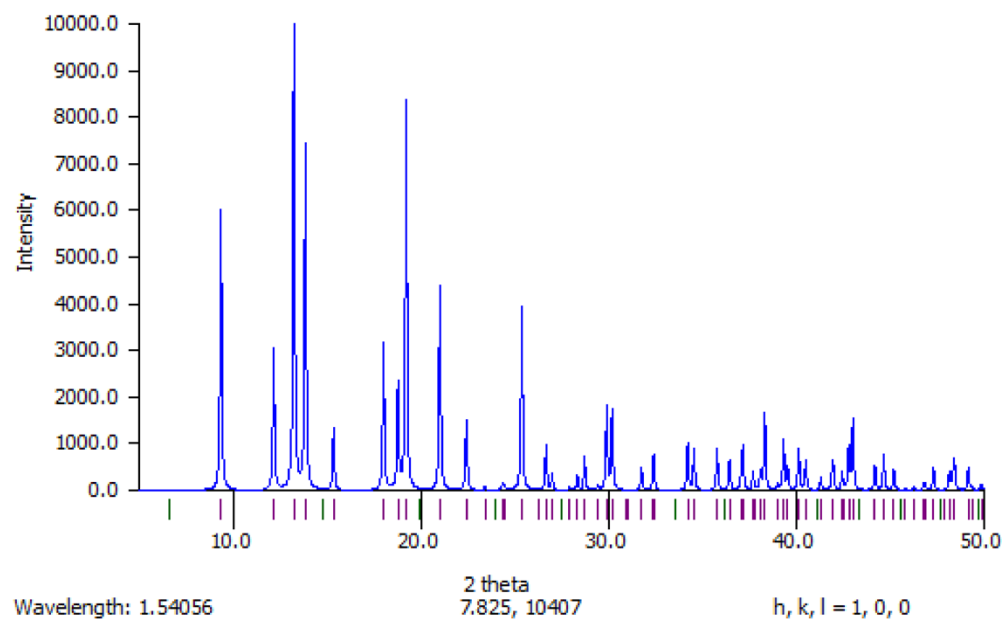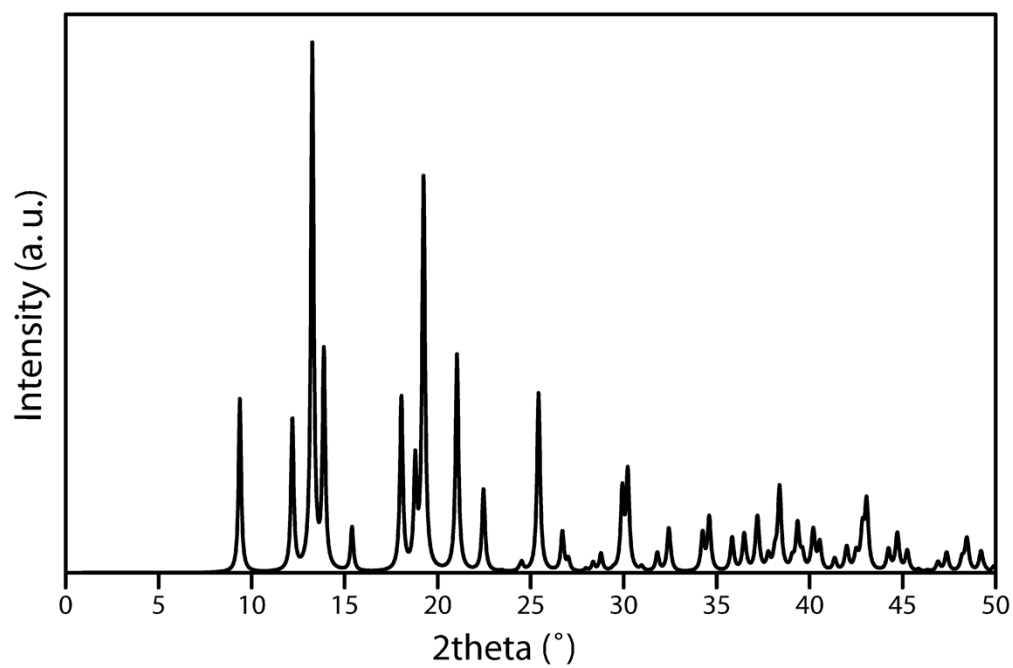

**Figure S6.** Calculated (top) and experimental (bottom) XRPD pattern profile of **1**, confirming the purity and authenticity of the studied bulk sample.
